# Supplementary material for: Methodological steps used by authors of systematic reviews and meta-analyses of clinical trials: a cross-sectional study
Source: PubMed Central journal article supplement (PMC6659247; doi:10.1186/s12874-019-0780-2), 2019-07-26

# BMC Medical Research Methodology

## Methodological steps used by authors of systematic reviews and meta-analyses of clinical trials: A cross-sectional study --Manuscript Draft--

|                                                      |                                                                                                                                                                                                                                                                                                                                                                                                                                                                                                                                                                                                                                                                                                                                                                                                                                                                                                                                                                                                                                                                                                                                                                                                                                                                                                                                                                                                                                                                                                                                                                                                                                                                                                                                                                                                                                                                              |
|------------------------------------------------------|------------------------------------------------------------------------------------------------------------------------------------------------------------------------------------------------------------------------------------------------------------------------------------------------------------------------------------------------------------------------------------------------------------------------------------------------------------------------------------------------------------------------------------------------------------------------------------------------------------------------------------------------------------------------------------------------------------------------------------------------------------------------------------------------------------------------------------------------------------------------------------------------------------------------------------------------------------------------------------------------------------------------------------------------------------------------------------------------------------------------------------------------------------------------------------------------------------------------------------------------------------------------------------------------------------------------------------------------------------------------------------------------------------------------------------------------------------------------------------------------------------------------------------------------------------------------------------------------------------------------------------------------------------------------------------------------------------------------------------------------------------------------------------------------------------------------------------------------------------------------------|
| <b>Manuscript Number:</b>                            | BMRM-D-17-00523R6                                                                                                                                                                                                                                                                                                                                                                                                                                                                                                                                                                                                                                                                                                                                                                                                                                                                                                                                                                                                                                                                                                                                                                                                                                                                                                                                                                                                                                                                                                                                                                                                                                                                                                                                                                                                                                                            |
| <b>Full Title:</b>                                   | Methodological steps used by authors of systematic reviews and meta-analyses of clinical trials: A cross-sectional study                                                                                                                                                                                                                                                                                                                                                                                                                                                                                                                                                                                                                                                                                                                                                                                                                                                                                                                                                                                                                                                                                                                                                                                                                                                                                                                                                                                                                                                                                                                                                                                                                                                                                                                                                     |
| <b>Article Type:</b>                                 | Research article                                                                                                                                                                                                                                                                                                                                                                                                                                                                                                                                                                                                                                                                                                                                                                                                                                                                                                                                                                                                                                                                                                                                                                                                                                                                                                                                                                                                                                                                                                                                                                                                                                                                                                                                                                                                                                                             |
| <b>Section/Category:</b>                             | Data analysis, statistics and modelling                                                                                                                                                                                                                                                                                                                                                                                                                                                                                                                                                                                                                                                                                                                                                                                                                                                                                                                                                                                                                                                                                                                                                                                                                                                                                                                                                                                                                                                                                                                                                                                                                                                                                                                                                                                                                                      |
| <b>Funding Information:</b>                          |                                                                                                                                                                                                                                                                                                                                                                                                                                                                                                                                                                                                                                                                                                                                                                                                                                                                                                                                                                                                                                                                                                                                                                                                                                                                                                                                                                                                                                                                                                                                                                                                                                                                                                                                                                                                                                                                              |
| <b>Abstract:</b>                                     | <p><b>Background</b><br/>The quality of systematic reviews and meta-analyses (SR/MAs) depends on the extent of the methods used. We investigated the methodological steps used by authors of SR/MAs of clinical trials via an author survey.</p> <p><b>Methods</b><br/>We conducted an email-based cross-sectional study by contacting corresponding authors of SR/MAs that were published in 2015 and 2016 and retrieved through PubMed database. The 27-item questionnaire was developed to study the methodological steps used by authors when conducting a SR/MA and the demographic characteristics of the respondent. Besides the demographic characteristics, methodological questions regarding the source, extraction and synthesis of data were included.</p> <p><b>Results</b><br/>From 10,292 emails sent, 384 authors responded and were included in the final analysis. Manual searches were carried out by 69.2% of authors, while 87.3% do updated searches, 49.2% search grey literature, 74.9% use the Cochrane tool for risk of bias assessment, 69.8% assign more than two reviewers for data extraction, 20.5% use digital software to extract data from graphs, 57.9% use raw data in the meta-analysis, and 43.8% meta-analyze both adjusted and non-adjusted data. There was a positive correlation of years of experience in conduction of SR/MAs with both searching grey literature (<math>P=0.0003</math>) and use of adjusted and non-adjusted data (<math>P=0.006</math>).</p> <p><b>Conclusions</b><br/>Many authors still do not carry out many of the vital methodological steps to be taken when performing any SR/MA. The experience of the authors in SR/MAs is highly correlated with use of the recommended tips for SR/MA conduct. The optimal methodological approach for researchers conducting a SR/MA should be standardized.</p> |
| <b>Corresponding Author:</b>                         | Nguyen Tien Huy, Ph.D.<br>Ton Duc Thang University<br>Ho Chi Minh, VIET NAM                                                                                                                                                                                                                                                                                                                                                                                                                                                                                                                                                                                                                                                                                                                                                                                                                                                                                                                                                                                                                                                                                                                                                                                                                                                                                                                                                                                                                                                                                                                                                                                                                                                                                                                                                                                                  |
| <b>Corresponding Author E-Mail:</b>                  | nguyentienhuy@tdtu.edu.vn;tienhuy@nagasaki-u.ac.jp                                                                                                                                                                                                                                                                                                                                                                                                                                                                                                                                                                                                                                                                                                                                                                                                                                                                                                                                                                                                                                                                                                                                                                                                                                                                                                                                                                                                                                                                                                                                                                                                                                                                                                                                                                                                                           |
| <b>Corresponding Author Secondary Information:</b>   |                                                                                                                                                                                                                                                                                                                                                                                                                                                                                                                                                                                                                                                                                                                                                                                                                                                                                                                                                                                                                                                                                                                                                                                                                                                                                                                                                                                                                                                                                                                                                                                                                                                                                                                                                                                                                                                                              |
| <b>Corresponding Author's Institution:</b>           | Ton Duc Thang University                                                                                                                                                                                                                                                                                                                                                                                                                                                                                                                                                                                                                                                                                                                                                                                                                                                                                                                                                                                                                                                                                                                                                                                                                                                                                                                                                                                                                                                                                                                                                                                                                                                                                                                                                                                                                                                     |
| <b>Corresponding Author's Secondary Institution:</b> |                                                                                                                                                                                                                                                                                                                                                                                                                                                                                                                                                                                                                                                                                                                                                                                                                                                                                                                                                                                                                                                                                                                                                                                                                                                                                                                                                                                                                                                                                                                                                                                                                                                                                                                                                                                                                                                                              |
| <b>First Author:</b>                                 | Hoang Thi Nam Giang                                                                                                                                                                                                                                                                                                                                                                                                                                                                                                                                                                                                                                                                                                                                                                                                                                                                                                                                                                                                                                                                                                                                                                                                                                                                                                                                                                                                                                                                                                                                                                                                                                                                                                                                                                                                                                                          |
| <b>First Author Secondary Information:</b>           |                                                                                                                                                                                                                                                                                                                                                                                                                                                                                                                                                                                                                                                                                                                                                                                                                                                                                                                                                                                                                                                                                                                                                                                                                                                                                                                                                                                                                                                                                                                                                                                                                                                                                                                                                                                                                                                                              |
| <b>Order of Authors:</b>                             | Hoang Thi Nam Giang<br>Ali Mahmoud Ahmed<br>Reem Fala<br>Mohamed Magdy Khattab                                                                                                                                                                                                                                                                                                                                                                                                                                                                                                                                                                                                                                                                                                                                                                                                                                                                                                                                                                                                                                                                                                                                                                                                                                                                                                                                                                                                                                                                                                                                                                                                                                                                                                                                                                                               |

|                                                |                                                                                                                                                                                                                                                                                                                                                                                                                                                                                                                                                                                                                                                                                                                                                                                                                                                                                                                  |
|------------------------------------------------|------------------------------------------------------------------------------------------------------------------------------------------------------------------------------------------------------------------------------------------------------------------------------------------------------------------------------------------------------------------------------------------------------------------------------------------------------------------------------------------------------------------------------------------------------------------------------------------------------------------------------------------------------------------------------------------------------------------------------------------------------------------------------------------------------------------------------------------------------------------------------------------------------------------|
|                                                | Mona Hassan Ahmed Othman                                                                                                                                                                                                                                                                                                                                                                                                                                                                                                                                                                                                                                                                                                                                                                                                                                                                                         |
|                                                | Sara Abdelrahman                                                                                                                                                                                                                                                                                                                                                                                                                                                                                                                                                                                                                                                                                                                                                                                                                                                                                                 |
|                                                | Le Phuong Thao                                                                                                                                                                                                                                                                                                                                                                                                                                                                                                                                                                                                                                                                                                                                                                                                                                                                                                   |
|                                                | Ahmed Gabl                                                                                                                                                                                                                                                                                                                                                                                                                                                                                                                                                                                                                                                                                                                                                                                                                                                                                                       |
|                                                | Samar Elrashedy                                                                                                                                                                                                                                                                                                                                                                                                                                                                                                                                                                                                                                                                                                                                                                                                                                                                                                  |
|                                                | Peter N. Lee                                                                                                                                                                                                                                                                                                                                                                                                                                                                                                                                                                                                                                                                                                                                                                                                                                                                                                     |
|                                                | Kenji Hirayama                                                                                                                                                                                                                                                                                                                                                                                                                                                                                                                                                                                                                                                                                                                                                                                                                                                                                                   |
|                                                | Hosni Salem                                                                                                                                                                                                                                                                                                                                                                                                                                                                                                                                                                                                                                                                                                                                                                                                                                                                                                      |
|                                                | Nguyen Tien Huy, Ph.D.                                                                                                                                                                                                                                                                                                                                                                                                                                                                                                                                                                                                                                                                                                                                                                                                                                                                                           |
| <b>Order of Authors Secondary Information:</b> |                                                                                                                                                                                                                                                                                                                                                                                                                                                                                                                                                                                                                                                                                                                                                                                                                                                                                                                  |
| <b>Response to Reviewers:</b>                  | <p>Dear Dr. Puljak,</p> <p>We wish to thank you for carefully going through our manuscript and the constructive comments. We have revised the manuscript according to your suggestions. At this stage, we uploaded our manuscript as a clean version.</p> <p>The individual contributions of all authors to the manuscript should be specified in the Authors' Contributions section. If there are any duplicated initials, please differentiate them to make it clear that the initials refer to separate authors.<br/>Reply: We have amended Author's Contribution section as suggested.</p> <p>Please add a "Conclusions" section after the "Discussion" section. This should state clearly the main conclusions of the research article and give a clear explanation of their importance and relevance.<br/>Reply: We have added Conclusion section.</p> <p>On behalf of all authors<br/>Nguyen Tien Huy</p> |

Click here to view linked References

1

1 **Methodological steps used by authors of systematic reviews and meta-analyses of clinical**  
2 **trials: A cross-sectional study**

3 **Short title:** Methodological steps used by systematic review authors

4  
5 **Hoang Thi Nam Giang<sup>1,2,⊕</sup>, Ali Mahmoud Ahmed<sup>2,3,⊕</sup>, Reem Yousry Fala<sup>2,4</sup>, Mohamed**  
6 **Magdy Khattab<sup>2,3</sup>, Mona Hassan Ahmed Othman<sup>2,5</sup>, Sara Attia Mahmoud**  
7 **Abdelrahman<sup>2,6</sup>, Le Phuong Thao<sup>2,7</sup>, Ahmed Elsaid Abd Elsamie Gabl<sup>2,8</sup>, Samar Ahmed**  
8 **Elrashedy<sup>2,9</sup>, Peter N Lee<sup>10</sup>, Kenji Hirayama<sup>11</sup>, Hosni Salem<sup>12</sup>, and Nguyen Tien Huy<sup>13,14\*</sup>**

9  
10 <sup>1</sup>Faculty of Medicine and Pharmacy, The University of Da Nang, Viet Nam

11 <sup>2</sup>Online Research Club (<http://www.onlineresearchclub.org/>)

12 <sup>3</sup>Faculty of Medicine, Al-Azhar University, Cairo, Egypt

13 <sup>4</sup>Faculty of Medicine, Al-Azhar University, Damitta, Egypt

14 <sup>5</sup>Al-Azhar University, Faculty of Medicine for Girls (AFMG), Cairo, Egypt

15 <sup>6</sup>Ministry of Health and People-sector of Regional Affair, Cairo, Egypt

16 <sup>7</sup>University of Medicine and Pharmacy, Ho Chi Minh City, Viet Nam

17 <sup>8</sup>Faculty of Veterinary Medicine, Kafr Elshiekh University, Kafr Elshiekh, Egypt

18 <sup>9</sup>Faculty of Medicine, Tanta University, Tanta, Egypt

19 <sup>10</sup>P.N.Lee Statistics and Computing Ltd, 17 Cedar Road, Sutton, Surrey, SM2 5DA, UK

20 <sup>11</sup>Department of Immunogenetics, Institute of Tropical Medicine (NEKKEN), Leading  
21 Graduate School Program, and Graduate School of Biomedical Sciences, Nagasaki University,  
22 Nagasaki 852-8523, Japan.

23 <sup>12</sup>Faculty of Medicine, Cairo University, Cairo, Egypt

24 <sup>13</sup>Evidence Based Medicine Research Group & Faculty of Applied Sciences, Ton Duc Thang  
25 University, Ho Chi Minh City, 70000, Viet Nam

26 <sup>14</sup>Department of Clinical Product Development, Institute of Tropical Medicine (NEKKEN),  
27 Leading Graduate School Program, and Graduate School of Biomedical Sciences, Nagasaki  
28 University, Nagasaki 852-8523, Japan.

29  
30 <sup>⊕</sup>Authors equally contributed to the work.

31  
32 \*Correspondence to:

33 Nguyen Tien Huy, Evidence Based Medicine Research Group & Faculty of Applied Sciences,  
34 Ton Duc Thang University, Ho Chi Minh City, Viet Nam

35 (E-Mail: [nguyentienhuy@tdt.edu.vn](mailto:nguyentienhuy@tdt.edu.vn))

36  
37 Emails

38 Hoang Thi Nam Giang: [htngiang@ud.edu.vn](mailto:htngiang@ud.edu.vn)

61  
62  
63  
64  
65

- 1 Ali Mahmoud Ahmed: [ali.m.ahmed@azhar.edu.eg](mailto:ali.m.ahmed@azhar.edu.eg)
- 2 Reem Yousry Fala: [Reemfalla@gmail.com](mailto:Reemfalla@gmail.com)
- 3 Mohamed Magdy Khattab: [mohamed.magdy@azhar.edu.eg](mailto:mohamed.magdy@azhar.edu.eg)
- 4 Mona Hassan Ahmed Othman: [monahassan3333@azhar.edu.eg](mailto:monahassan3333@azhar.edu.eg)
- 5 Sara Attia Mahmoud Abdelrahman: [sarahlatteya@yahoo.com](mailto:sarahlatteya@yahoo.com)
- 6 Le Phuong Thao: [lephuongthao294@gmail.com](mailto:lephuongthao294@gmail.com)
- 7 Ahmed Elsaid Abd Elsamie Gabl: [ahmedgabl.2014@gmail.com](mailto:ahmedgabl.2014@gmail.com)
- 8 Samar Ahmed Elrashedy: [smar.ahmed1956@yahoo.com](mailto:smar.ahmed1956@yahoo.com)
- 9 Peter N Lee: [peterlee@pnlee.co.uk](mailto:peterlee@pnlee.co.uk)
- 10 Kenji Hirayama: [hiraken@nagasaki-u.ac.jp](mailto:hiraken@nagasaki-u.ac.jp)
- 11 Hosni Salem: [dr\\_hosni@kasralainy.edu.eg](mailto:dr_hosni@kasralainy.edu.eg)
- 12 Nguyen Tien Huy : [nguyentienhuy@tdt.edu.vn](mailto:nguyentienhuy@tdt.edu.vn)

13

## ABSTRACT

### Background

The quality of systematic reviews and meta-analyses (SR/MAs) depends on the extent of the methods used. We investigated the methodological steps used by authors of SR/MAs of clinical trials via an author survey.

### Methods

We conducted an email-based cross-sectional study by contacting corresponding authors of SR/MAs that were published in 2015 and 2016 and retrieved through PubMed database. The 27-item questionnaire was developed to study the methodological steps used by authors when conducting a SR/MA and the demographic characteristics of the respondent. Besides the demographic characteristics, methodological questions regarding the source, extraction and synthesis of data were included.

### Results

From 10,292 emails sent, 384 authors responded and were included in the final analysis. Manual searches were carried out by 69.2% of authors, while 87.3% do updated searches, 49.2% search grey literature, 74.9% use the Cochrane tool for risk of bias assessment, 69.8% assign more than two reviewers for data extraction, 20.5% use digital software to extract data from graphs, 57.9% use raw data in the meta-analysis, and 43.8% meta-analyze both adjusted and non-adjusted data. There was a positive correlation of years of experience in conduction of SR/MAs with both searching grey literature ( $P=0.0003$ ) and use of adjusted and non-adjusted data ( $P=0.006$ ).

### Conclusions

Many authors still do not carry out many of the vital methodological steps to be taken when performing any SR/MA. The experience of the authors in SR/MAs is highly correlated with use of the recommended tips for SR/MA conduct. The optimal methodological approach for researchers conducting a SR/MA should be standardized.

Keywords: Systematic review, data extraction, meta-analysis, cross sectional study

## Background

Systematic review (SR) with meta-analysis (MA) is a method for combining all available evidence fulfilling pre-determined criteria to answer a pre-defined question [1]. It is recognized as being a crucial component of the practice of evidence-based medicine in order to obtain the highest level of evidence to formulate recommendations for clinical practice [2].

Each systematic review with meta-analysis should be designed and planned carefully. It should involve a comprehensive method for extracting, combining and analyzing relevant data. A wrong conclusion can be drawn if the data were extracted and handled inappropriately or the MA is conducted using inappropriate methods [3].

SR/MA, as a growing field [4], may face methodological problems such as publication bias, which can affect the validity of a SR [3]. Moreover, when conducting a search, not all researchers use as many as possible of the relevant databases, and identify the related grey literature, i.e. reports not published in a journal or book [1]. Conference abstracts are recognized as being an important source of grey literature, and with the addition of other grey sources, account for approximately 10% of the literature included in SRs [1]. Depending on the research question, the importance of searching grey literature varies. Some SR/MAs rely more heavily on the inclusion of relevant grey literature than others.

The quality of a SR/MA depends not only on the number of databases searched, but also on the search strategy and search terms used. Also, SR/MA researchers may apply restrictions to the language and period of publication, which may lead to the loss of many potential studies, so affecting the final estimate [5]. Inappropriate data handling, including dealing with missing data, is still often detected, and can induce substantial bias [2]. The quality of a SR/MA depends on the methods used to minimize bias. There are more than 100 scales for assessing study quality or risk of bias, and authors should choose the appropriate metric carefully [6].

1 Using different quality scales can produce different results from the same study [7, 8].  
2 Heterogeneity between the studies included in a MA, the so-called mixing of apples and  
3 oranges, represents another challenge that researchers face when pooling results from different  
4 studies [9]. Another major problem is that many researchers fail properly to interpret the  
5 results of their MAs [2].  
6  
7  
8  
9  
10

11 While there may be no universal consensus adhered to by all authors of SRs, the methodology  
12 for conducting them is well developed and many guides for their conduct are available [1, 10,  
13 11]. Notably, the Cochrane Handbook for Systematic Reviews of Interventions has defined  
14 procedures for addressing the methodological challenges in conducting SRs [1]. Apart from  
15 methodological guidelines, SR methodologists have developed and proposed reporting  
16 guidelines and quality assessment tools. A Measurement Tool to Assess Systematic Reviews  
17 (AMSTAR), AMSTAR-2, ROBIS, and Preferred Reporting Items for Systematic Reviews  
18 and Meta-Analyses (PRISMA) are the well-known tools to guide reporting [12-15].  
19  
20  
21  
22  
23  
24  
25  
26  
27  
28  
29  
30  
31

32 Previous studies suggest that there may be considerable variability in the methodological  
33 processes authors choose to adopt while conducting a SR [16, 17]. In order to gain further  
34 insight, our cross-sectional survey aimed to investigate those methodological approaches used  
35 by authors when conducting SR/MAs of clinical trials.  
36  
37  
38  
39  
40  
41

## 42 **Methods**

### 43 **Study design**

44  
45 We identified corresponding authors of SR/MAs that were published in 2015 and 2016 using  
46 the PubMed database. We retrieved 12,693 e-mail addresses using the search syntaxes  
47 ("systematic review" or "systematic literature review" or "meta-analysis" or (Cochrane  
48 Database Syst. Rev)) and (trial or trials or randomized or randomised) (See Appendix 1 for  
49 the search strategy). After removal of duplicate e-mails, starting in 26 September 2016, we  
50 sent out an e-mail asking respondents to complete a questionnaire. This was successfully  
51  
52  
53  
54  
55  
56  
57  
58  
59  
60  
61  
62  
63  
64  
65

1 delivered to 10,292 authors, after excluding non-deliverable e-mails due to outdated e-mail  
2 addresses. A reminder was sent after one, three, and six weeks and the survey closed after 8  
3 weeks (Figure 1) [18-20].  
4  
5

## 6 **Questionnaire**

7  
8  
9  
10 The 27-item questionnaire was developed based on an analysis of the existing literature  
11 (Appendix 2). The questions concerning the demographic and professional characteristics of  
12 the authors included; age, gender, specialization, years of experience with SR/MA, number of  
13 published SR/MAs, highest impact factor of any published SR/MA, and experience in  
14 extracting data for a SR/MA. Further questions asked about the searching of databases, the  
15 risk of bias assessment, and data extraction for SR/MA, as well as about data synthesis and  
16 methods of MA. The questionnaire was designed as a Google form and a link was attached in  
17 the e-mail (<https://goo.gl/4Dddpj>). One response was set up for each participant. The validity  
18 of the questionnaire was tested by three waves of exploratory trials, in each of which the  
19 questionnaire was distributed to 30 colleagues who have experience with SR/MA.  
20  
21  
22  
23  
24  
25  
26  
27  
28  
29  
30  
31  
32  
33

## 34 **Data analysis**

35  
36  
37 Data were collected onto a Microsoft Excel spreadsheet and analyzed using the R Statistical  
38 Language (R Foundation for Statistical Computing, Vienna, Austria). Descriptive statistics,  
39 including frequencies and percentages in addition to means and standard deviations, were  
40 computed to describe respondents' characteristics and responses. Univariate logistic  
41 regression models were used to test associations with the professional background of the  
42 respondent (experience in conducting SR/MAs for more than five years, having more than  
43 fourteen published SR/MA papers, and having a SR/MA paper published in a journal with a  
44 journal impact factor (JIF) more than 10) as well as with practical attitudes to literature search,  
45 data extraction, and MA, with odds ratios (ORs) and 95% confidence interval (CIs) being  
46 presented. A two-tailed P value <0.05 was used to define a significant correlation.  
47  
48  
49  
50  
51  
52  
53  
54  
55  
56  
57  
58  
59  
60  
61  
62  
63  
64  
65



## **Ethical considerations**

The study strictly followed the Declaration of Helsinki [21]. We attached a cover letter to the email to inform participants about the survey objectives, that it would take approximately 10 minutes to complete the questionnaire, and that their participation in the study was voluntary. All participants were given information about the contact person and they had the opportunity to discuss issues related to the survey or the research project by giving a feedback. The invitation e-mail clearly stated that responses would remain anonymous and confidential. The first question of the survey represented an informed consent to join in the study. The questionnaire itself did not collect personal information. An ethical approval was not required for such an anonymous web-based survey, because Ton Duc Thang University, Ho Chi Minh city, Vietnam waives the need for ethical approval requests for such studies.

## **RESULTS**

### **Demographic and professional characteristics**

From the 10,292 e-mails sent, 385 responses were received. One response was omitted as most of the questions were incompletely answered, leaving 384 in the analysis shown in Table 1. The mean age of the participants was  $44.0 \pm 11.6$  and 258 (67.2%) were men. About half of the authors, 192 (50.7%), came from Europe, with internal medicine as the major specialization (49.0%). Among our respondents, there were 51 (13.5%) epidemiologists with some specialization in SRs. Over half the respondents (56.3%) had more than five years' experience in conducting a SR/MA. The mean number of published SR/MAs by our respondents was  $13.6 \pm 32.9$ . There were 56.5% of participants who had published SR/MAs in journals with an impact factor higher than 5. Most of the corresponding authors, 368 (95.8%), had experience in extracting data for MA.

Table 1 here

### **Searching information sources**

1 As noted in Table 2, the majority, 241 (63.1%), of respondents searched three to five  
2 information sources, and nearly 45 information sources were mentioned as having been  
3 searched by at least one respondent. These included ProQuest dissertations and abstracts,  
4 conference proceedings, grey literature databases and thesis sources. The proportions of  
5 respondents searching each information source are presented in Figure 2. The information  
6 source most often searched was PubMed or MEDLINE (99.7%) followed by EMBASE  
7 (76.6%), Cochrane library (76.3%), the Web of Science (WoS) (44.3%), CINAHL (36.5%),  
8 SCOPUS (30.7%), Google Scholar (29.4%), and PsycINFO (27.3%).  
9

10 Less than half of the respondents (n=171, 45%) always conducted a manual search, involving  
11 looking at references in relevant papers retrieved, in journal issues or in conference  
12 proceedings. As regards data extraction, 94.6% of respondents included all papers that  
13 appeared to be relevant. Also, 87.3% performed an updated search to include the most recent  
14 papers (Table 2). Significant positive associations were found between searching grey  
15 literature databases and whether researchers had experience in conducting SR/MAs for more  
16 than five years (OR=2.1, 95%CI [1.4 to 3.2], P<0.001) or had published more than 14 SR/MA  
17 publications (OR=2.6, 95%CI [1.5 to 4.2], P<0.001). There was no association between  
18 experience in conducting SR/MAs and either conducting a manual search or the number of  
19 information sources used in the search (Table 3).  
20  
21  
22  
23  
24  
25  
26  
27  
28  
29  
30  
31  
32  
33  
34  
35  
36  
37  
38  
39  
40  
41  
42  
43

44 Table 2 here

45  
46 Table 3 here

#### 47 48 49 **Risk of bias assessment**

50  
51  
52 There were 74.9% of the respondents who used the Cochrane tool to evaluate risk of bias in  
53 clinical trials. The remaining 25.1% reported using “other tools” and when asked to name  
54 those tools, the most frequent responses were: Downs and Black checklist, CONSORT,  
55 modified Jadad scale, and CAMARADES tool.  
56  
57  
58  
59  
60  
61  
62  
63  
64  
65

## Data extraction

As regards data extraction, using two reviewers was the most common approach used (by 58.1%), then one reviewer extracting and another or more subsequently checking (30.2%), then using more reviewers (11.7%). Of the 376 respondents, 211 (56.1%) contacted the authors of the papers to obtain the original data if the data were represented only in figures and graphs. Only 77 researchers (20.5%) used software to extract data from figures and graphs. Other 13 researchers (3.5%) indicated that extraction data from figures is unreliable. There were 75 researchers (19.9%) who did not know of or use such digital software. The regression analysis (Table 3) indicated that authors with  $\geq 14$  publications in SR/MA were more likely to extract the data using two or more independent reviewers (OR=1.9, 95%CI [1.05 to 3.3], P=0.03). In addition, those authors and authors with SR/MA papers published in a journal with a JIF >10 more frequently used digital software to extract data from figures (OR=2.4, 95%CI [1.4 to 4.1], P=0.002) and (OR=2.3, 95%CI [1.3 to 4.0], P=0.003) respectively (Table 3).

## Data synthesis

Occasionally, authors did not report the difference between pre- and post-intervention in both intervention and control groups in clinical trials. Instead, they separately reported the pre- and post-intervention data (pre/post). Of those 364 authors responding to that question, 161 (44.2%) reported previous knowledge about this and accounted for it in data extraction. Of these 161 researchers, 156 shared the way that they dealt with this data in the MA. Among these 156 authors, 25.6% used only post-difference values for each group, with 25% using pre- and post-difference values for each group with the correlation value. In addition, among the same 161 authors who have previous knowledge on pre/post data, 157 shared their practice when the only data available were the pre- and post-intervention values for each group without the correlation. Among these 157 authors, 53 (33.8%) chose to request the data from the

1 authors of the original articles. If there was no response from the original authors, 28 (17.8%)  
2 used a default correlation value of 0.5 and 32 (20.4%) conducted multiple analyses with  
3 correlation values ranging from 0.1-0.9. There were 44 authors (28%) who did not know what  
4 was meant by the correlation value.  
5  
6  
7

8  
9 Of the total of 384 authors, 382 shared their experience in using raw data in MA. Among the  
10 382, 221 (57.9%) preferred pooling the raw data, while 26 (6.8%) preferred pooling the  
11 analyzed results. A total of 372 authors shared their experience in dealing with adjusted and  
12 unadjusted data. Among these, 58 (15.6%) meta-analyzed the unadjusted data alone, 118  
13 (31.7%) meta-analyzed the adjusted data alone, and 163 (43.8%) meta-analyzed both.  
14  
15  
16  
17  
18  
19  
20  
21

22 One of the most controversial points when conducting a MA concerns repeating the control  
23 group data in subgroup MA, for example when the intervention group includes different doses,  
24 each with the same placebo control. Of the 384 responders, 350 answered the question on this.  
25 Of these, 275 (78.6%) do not do this because the same population cannot be pooled twice in  
26 one MA, and only the subtotal results should be meta-analyzed. In contrast, 75 (21.4%)  
27 wrongly pooled the same value twice in the same MA.  
28  
29  
30  
31  
32  
33  
34  
35  
36

37 Regarding use of correlations in MA, 370 authors shared their experience in Pearson  
38 correlations, of whom 96 (25.9%) reported using it, while 368 authors shared their experience  
39 in Spearman correlations, of whom 71 authors (19.3%) reported using it. Of the total of 384  
40 researchers, 190 answered the question regarding the combination of these two methods.  
41 Among these 190, 127 (66.8%) preferred using each method in two separate MAs, 23 (12.1%)  
42 preferred the combination of both methods, 34 (17.9%) use only Pearson's method, and 6  
43 (3.2%) used only Spearman's method (Table 4).  
44  
45  
46  
47  
48  
49  
50  
51  
52  
53

54 There was a significant negative association between more than five-year experience in  
55 conducting SR/MA of the authors and pooling the same data twice in one MA (OR=0.3,  
56 95%CI [0.2 to 0.7], P=0.004). compared with authors with lower experience, authors with  
57  
58  
59  
60  
61  
62  
63  
64  
65

1 more than 14 published SR/MA papers significantly preferred to use the raw data in the MA  
2 rather than the analyzed data (OR=1.8, 95%CI [1.1 to 3.0], P=0.03). Conducting other MA  
3  
4 procedures was not associated with experience in conducting SR/MA (Table 3).  
5  
6

7 Table 4 here  
8  
9

## 10 **Discussion**

11  
12 Despite the presence of many guidelines and checklists concerning the methodology of  
13 SRs/MAs [12, 13, 22], the quality of published SR/MAs is variable and lacks consistency.  
14  
15 [23-26]. Our study showed considerable variability in the methods that authors choose to  
16  
17 adopt when conducting and reporting SR/MAs. Many authors still do not apply recommended  
18  
19 methods. Thus, for example, authors fail to conduct manual searches for new studies, fail to  
20  
21 update searches, carry out data extraction by only one reviewer, and report the same data twice  
22  
23 in subgroup MA.  
24  
25  
26  
27  
28

29  
30 In our survey, the five most common information sources searched were PubMed, EMBASE,  
31  
32 Cochrane library, WoS and CINAHL. Three of these five information sources (EMBASE,  
33  
34 Cochrane library, CINAHL) corresponded to the most frequently searched databases in  
35  
36 reviews of physiotherapy [27]. However, authors in our survey use databases that are freely  
37  
38 available (PubMed) rather than those requiring a paid subscription (EMBASE). Besides its  
39  
40 free availability, PubMed has updated several features to facilitate more comprehensive  
41  
42 searching [27]. Conducting a comprehensive literature search is central to reducing selection  
43  
44 and publication bias in SRs [28].  
45  
46  
47  
48

49  
50 The number of databases and the quality of the search strategy are crucial for an effective  
51  
52 literature search. In recent years, there is an increasing reliance on a range of databases or on  
53  
54 the combination of different database including Medline and EMBASE, allied health  
55  
56 databases (e.g., CINAHL and PsycINFO), and web-based searching to locate grey literature  
57  
58 [29]. Some of the "databases" mentioned by the respondents are not exactly databases. This  
59  
60  
61  
62  
63  
64  
65

1 indicates that not all SR authors have sufficient knowledge regarding search engines and  
2 information sources. Less than 50% of authors use manual searches, or “hand-searches”, based  
3  
4 on reference lists of published papers and also possibly study relevant conference proceedings  
5  
6 or specific journal issues [1, 30]. This is unsatisfactory as such additional searches are very  
7  
8 important to retrieve reports missed from the electronic databases search and to overcome the  
9  
10 problem of inadequate search strategies. Methods of manual searching can vary. Authors are  
11  
12 not routinely expected to undertake manual searches of journal contents; however scrutinizing  
13  
14 reference lists is recommended. One may expect to find significant correlations between  
15  
16 searching grey literature or manual search and respondent characteristics indicating  
17  
18 experience, such as having conducting SR/MA for more than five years, or having more than  
19  
20 14 SR/MA publications. A previous study concluded that grey literature searching, adjusting  
21  
22 terms and author-reported searching in SRs were sub-optimal and need to be improved [31].  
23  
24 Also, this study suggested that librarian involvement contributes to a comprehensive and  
25  
26 reproducible search strategy to study identification and helps to produce high quality SR/MAs  
27  
28 [31]. Another study stated that searching for grey literature with the help of a librarian would  
29  
30 be easier [32]. The involvement of other experts, including statisticians can also affect quality.  
31  
32  
33  
34  
35  
36  
37  
38  
39  
40  
41  
42  
43  
44  
45  
46  
47  
48  
49  
50  
51  
52  
53  
54  
55  
56  
57  
58  
59  
60  
61  
62  
63  
64  
65  
The tool used for quality assessment should cover all methodological criteria relevant to the  
validity and interpretation of the included papers, taking into consideration the design of the  
studies considered [33]. Several domains for detecting and controlling the risk and source of  
bias should be evaluated. In many SR/MAs of clinical trials, absence of allocation  
concealment and inadequate randomization and blinding were associated with overestimation  
of the effect. Pildal *et al*, who replicated a MA of 70 studies, found that more than two-thirds  
of papers, with an overall effect estimate favouring certain interventions, showed no  
significant effect estimate after excluding papers with inappropriate allocation concealment  
[34]. Among the different metrics, Cochrane proposed a robust tool for assessing risk of bias

1 of the included clinical trials [1, 35]. Although about 75.0% of the respondents used the  
2 Cochrane tool, we did not properly assess the usage of other metrics [25, 36, 37]. Most of the  
3  
4 other tools mentioned by the authors are not risk of bias assessment tools, but tools for  
5 assessing the quality of reporting. Therefore, their usage for risk of bias assessment is  
6  
7 inappropriate.  
8  
9  
10

11  
12 Data extraction and handling is a fundamental step, and one of those that most determines the  
13 reliability of a SR/MA. Although a third (30.2%) of our respondents considered that only one  
14 reviewer was needed to extract the data of interest, they used other reviewers to check the  
15 extracted data to avoid potential bias, a procedure which is considered acceptable by  
16  
17 AMSTAR [38]. Jones *et al* analyzed the data extraction methods in 34 Cochrane reviews and  
18 reported that it was carried out by two extractors independently in 30, by only one extractor  
19 in two, with two not stating the number of extractors [39]. Recently, some software packages,  
20 such as Plot Digitizer and Getdata Graph Digitizer [40], have become available to extract data  
21 represented only in graphs. Using such software for extracting data from figures was faster  
22 and provided higher interrater reliability [41]. However, those software solutions have not yet  
23 been incorporated into methodological guidelines, so it was unsurprising to find that only  
24  
25 20.5% of authors used them.  
26  
27  
28  
29  
30  
31  
32  
33  
34  
35  
36  
37  
38  
39  
40  
41

42 Turning now to methods of conducting MA, a widespread barrier for computing and  
43 calculating effect sizes (when extracting data from studies) is when crucial data, such as  
44 variances, standard deviations and standard errors, are not available from the study [42]. To  
45 try to cope with this, a large diversity of conversions and alternative formulations of effect  
46 sizes are available, many offered as computer packages [43]. Lajeunesse *et al* outlined a few  
47 simple imputation approaches that can be used to fill gaps in missing SDs when conversions  
48 are not possible [44]. These approaches include relying on resampling approaches to fill gaps,  
49 and estimating the coefficient of variation from the (complete) observed data. These  
50  
51  
52  
53  
54  
55  
56  
57  
58  
59  
60  
61  
62  
63  
64  
65

1 approaches should only be applied when data extraction from all the studies has been  
2 completed. These SD imputation tools include metagear, which provides two variations on  
3 Rubin & Schenker's (1991) 'hot deck' imputation approach and imputes only SDs that are  
4 nearest neighbours relative to their means (i.e. it imputes SDs from data with means of a  
5 similar scale) [45]. Another SD imputation tool is Bracken's (1992) method for filling missing  
6 information using the coefficient of variation from all studies with complete information,  
7 which is a strictly random hot deck imputation [46].  
8  
9

10 Handling and analyzing pre/post continuous data remains a point for debate as the data in each  
11 study that should be pooled is the effect estimate, not the post data, and usually the correlation  
12 is not present. Regarding this point, the responses of the authors were similar for the proposed  
13 solutions. Not many respondents chose to contact the authors of the original reports to get the  
14 data. Contacting the authors does not occur frequently in reviews due to the low and delayed  
15 response rates [47]. However, 28% of the surveyed authors did not know what the correlation  
16 means, which may reflect their not having faced this issue before.  
17  
18

19 In MA, pooling the analyzed or estimated data is not recommended and may be misleading.  
20 In our case, only 6.8% used analyzed results. How to deal with adjusted or unadjusted data in  
21 MA is an issue that needs to be highlighted and further investigated. The percentage of authors  
22 who analyzed only adjusted data, only non-adjusted data, or both was 91.1%. Like meta-  
23 regression, subgroup MA is a method for testing the effect of covariates on the overall effect  
24 estimate. However, a common mistake is repeating the control group data in subgroup MA  
25 when the cause of subgrouping relates to the nature of the intervention group (such as different  
26 doses), which leads to hyperinflation of the control group in the overall effect size. Among  
27 our respondents, the percentage of authors who indicated they do that is 21.4%. When the  
28 primary studies reported a correlation, the pooled effect size is the correlation coefficient.  
29  
30  
31  
32  
33  
34  
35  
36  
37  
38  
39  
40  
41  
42  
43  
44  
45  
46  
47  
48  
49  
50  
51  
52  
53  
54  
55  
56  
57  
58  
59  
60  
61  
62  
63  
64  
65



1 Therefore, it is satisfactory to find that two thirds of our respondents chose to use both Pearson  
2 and Spearman correlations in separate MAs.  
3

4  
5 A limitation of our study is the low response rate. However, since we contacted many potential  
6 participants, we still managed to get response from more than three hundred SR/MA authors.  
7  
8 Many online surveys traditionally experience low response rates, which may result in selection  
9 bias and lower generalizability of results. Further, while SR/MA methodology has advanced in  
10 the years since Cochrane reviews first began to be published, our study did not choose to limit  
11 the search to reviews published since then.  
12  
13  
14  
15  
16  
17  
18  
19

20 Although we conducted piloting of the questionnaire, some of the questions may have still  
21 remained unclear to respondents. Furthermore, our questions did not cover some aspects, such  
22 as changing inclusion and exclusion criteria, or even changing the main study question after  
23 the search revealed an inadequate number of studies (sample size). Some Cochrane SRs have  
24 been published with zero studies included. Moreover, we did not ask any question about the  
25 composition of the SR/MA team, for example whether or not it included specialists like  
26 librarians and statisticians. We focused more on how each step was done. Similarly, we did  
27 not include a question about participation in Cochrane reviews to compare Cochrane authors  
28 with non-Cochrane authors. Furthermore, the absence of content analysis of published SRs is  
29 a limitation as it may provide more information compared to our survey. In the search strategy  
30 to identify SR/MAs in PubMed we did not choose to limit our search on publication date. This  
31 is one limitation of our study, as the methodology of SRs keeps evolving.  
32  
33  
34  
35  
36  
37  
38  
39  
40  
41  
42  
43  
44  
45  
46  
47  
48

## 49 **Conclusion**

50  
51 Many surveyed SR/MA authors indicated that they did not utilize many of the crucial  
52 methodological steps which should be considered in the conduct of an SR/MA. These  
53 insufficiently used methodological steps were: the manual and the updated search; data  
54 extraction by more than one reviewer independently; pooling the difference between both pre-  
55  
56  
57  
58  
59  
60  
61  
62  
63  
64  
65

1 and post-treatment values in the MA; and avoiding including the same data twice in subgroup  
2 MA. The experience of the authors in doing SR/MAs is positively correlated with using the  
3 recommended procedures for conducting a SR/MA. Guidelines for optimal methodology for  
4 conducting SR/MAs remain to be defined and authors of such studies should be required to  
5 follow them. Journals should specify in their instructions for authors which methodological  
6 steps they expect to be reported in submitted SR/MAs  
7  
8  
9  
10  
11  
12  
13

### 14 **List of abbreviations**

15  
16  
17 CI: confidence interval

18  
19  
20 JIF: journal impact factor

21  
22  
23 MA: meta-analysis

24  
25  
26 OR: odds ratio

27  
28  
29 SD: standard deviation

30  
31  
32 SR: systematic review

33  
34  
35 SR/MA: systematic review and meta-analysis

### 36 **Declarations**

#### 37 ***Ethics approval and consent to participate***

38  
39  
40  
41 Participation by individuals capable of informed consent as subjects in this survey was  
42 voluntary and the informed consent was embedded in the cover letter of the email, an ethics  
43 approval from Nagasaki University not being required for an anonymous web-based survey.  
44  
45  
46  
47  
48  
49  
50  
51  
52  
53  
54  
55  
56  
57  
58  
59  
60  
61  
62  
63  
64  
65  
66  
67  
68  
69  
70  
71  
72  
73  
74  
75  
76  
77  
78  
79  
80  
81  
82  
83  
84  
85  
86  
87  
88  
89  
90  
91  
92  
93  
94  
95  
96  
97  
98  
99  
100  
101  
102  
103  
104  
105  
106  
107  
108  
109  
110  
111  
112  
113  
114  
115  
116  
117  
118  
119  
120  
121  
122  
123  
124  
125  
126  
127  
128  
129  
130  
131  
132  
133  
134  
135  
136  
137  
138  
139  
140  
141  
142  
143  
144  
145  
146  
147  
148  
149  
150  
151  
152  
153  
154  
155  
156  
157  
158  
159  
160  
161  
162  
163  
164  
165  
166  
167  
168  
169  
170  
171  
172  
173  
174  
175  
176  
177  
178  
179  
180  
181  
182  
183  
184  
185  
186  
187  
188  
189  
190  
191  
192  
193  
194  
195  
196  
197  
198  
199  
200  
201  
202  
203  
204  
205  
206  
207  
208  
209  
210  
211  
212  
213  
214  
215  
216  
217  
218  
219  
220  
221  
222  
223  
224  
225  
226  
227  
228  
229  
230  
231  
232  
233  
234  
235  
236  
237  
238  
239  
240  
241  
242  
243  
244  
245  
246  
247  
248  
249  
250  
251  
252  
253  
254  
255  
256  
257  
258  
259  
260  
261  
262  
263  
264  
265  
266  
267  
268  
269  
270  
271  
272  
273  
274  
275  
276  
277  
278  
279  
280  
281  
282  
283  
284  
285  
286  
287  
288  
289  
290  
291  
292  
293  
294  
295  
296  
297  
298  
299  
300  
301  
302  
303  
304  
305  
306  
307  
308  
309  
310  
311  
312  
313  
314  
315  
316  
317  
318  
319  
320  
321  
322  
323  
324  
325  
326  
327  
328  
329  
330  
331  
332  
333  
334  
335  
336  
337  
338  
339  
340  
341  
342  
343  
344  
345  
346  
347  
348  
349  
350  
351  
352  
353  
354  
355  
356  
357  
358  
359  
360  
361  
362  
363  
364  
365  
366  
367  
368  
369  
370  
371  
372  
373  
374  
375  
376  
377  
378  
379  
380  
381  
382  
383  
384  
385  
386  
387  
388  
389  
390  
391  
392  
393  
394  
395  
396  
397  
398  
399  
400  
401  
402  
403  
404  
405  
406  
407  
408  
409  
410  
411  
412  
413  
414  
415  
416  
417  
418  
419  
420  
421  
422  
423  
424  
425  
426  
427  
428  
429  
430  
431  
432  
433  
434  
435  
436  
437  
438  
439  
440  
441  
442  
443  
444  
445  
446  
447  
448  
449  
450  
451  
452  
453  
454  
455  
456  
457  
458  
459  
460  
461  
462  
463  
464  
465  
466  
467  
468  
469  
470  
471  
472  
473  
474  
475  
476  
477  
478  
479  
480  
481  
482  
483  
484  
485  
486  
487  
488  
489  
490  
491  
492  
493  
494  
495  
496  
497  
498  
499  
500  
501  
502  
503  
504  
505  
506  
507  
508  
509  
510  
511  
512  
513  
514  
515  
516  
517  
518  
519  
520  
521  
522  
523  
524  
525  
526  
527  
528  
529  
530  
531  
532  
533  
534  
535  
536  
537  
538  
539  
540  
541  
542  
543  
544  
545  
546  
547  
548  
549  
550  
551  
552  
553  
554  
555  
556  
557  
558  
559  
560  
561  
562  
563  
564  
565  
566  
567  
568  
569  
570  
571  
572  
573  
574  
575  
576  
577  
578  
579  
580  
581  
582  
583  
584  
585  
586  
587  
588  
589  
590  
591  
592  
593  
594  
595  
596  
597  
598  
599  
600  
601  
602  
603  
604  
605  
606  
607  
608  
609  
610  
611  
612  
613  
614  
615  
616  
617  
618  
619  
620  
621  
622  
623  
624  
625  
626  
627  
628  
629  
630  
631  
632  
633  
634  
635  
636  
637  
638  
639  
640  
641  
642  
643  
644  
645  
646  
647  
648  
649  
650  
651  
652  
653  
654  
655  
656  
657  
658  
659  
660  
661  
662  
663  
664  
665  
666  
667  
668  
669  
670  
671  
672  
673  
674  
675  
676  
677  
678  
679  
680  
681  
682  
683  
684  
685  
686  
687  
688  
689  
690  
691  
692  
693  
694  
695  
696  
697  
698  
699  
700  
701  
702  
703  
704  
705  
706  
707  
708  
709  
710  
711  
712  
713  
714  
715  
716  
717  
718  
719  
720  
721  
722  
723  
724  
725  
726  
727  
728  
729  
730  
731  
732  
733  
734  
735  
736  
737  
738  
739  
740  
741  
742  
743  
744  
745  
746  
747  
748  
749  
750  
751  
752  
753  
754  
755  
756  
757  
758  
759  
760  
761  
762  
763  
764  
765  
766  
767  
768  
769  
770  
771  
772  
773  
774  
775  
776  
777  
778  
779  
780  
781  
782  
783  
784  
785  
786  
787  
788  
789  
790  
791  
792  
793  
794  
795  
796  
797  
798  
799  
800  
801  
802  
803  
804  
805  
806  
807  
808  
809  
810  
811  
812  
813  
814  
815  
816  
817  
818  
819  
820  
821  
822  
823  
824  
825  
826  
827  
828  
829  
830  
831  
832  
833  
834  
835  
836  
837  
838  
839  
840  
841  
842  
843  
844  
845  
846  
847  
848  
849  
850  
851  
852  
853  
854  
855  
856  
857  
858  
859  
860  
861  
862  
863  
864  
865  
866  
867  
868  
869  
870  
871  
872  
873  
874  
875  
876  
877  
878  
879  
880  
881  
882  
883  
884  
885  
886  
887  
888  
889  
890  
891  
892  
893  
894  
895  
896  
897  
898  
899  
900  
901  
902  
903  
904  
905  
906  
907  
908  
909  
910  
911  
912  
913  
914  
915  
916  
917  
918  
919  
920  
921  
922  
923  
924  
925  
926  
927  
928  
929  
930  
931  
932  
933  
934  
935  
936  
937  
938  
939  
940  
941  
942  
943  
944  
945  
946  
947  
948  
949  
950  
951  
952  
953  
954  
955  
956  
957  
958  
959  
960  
961  
962  
963  
964  
965  
966  
967  
968  
969  
970  
971  
972  
973  
974  
975  
976  
977  
978  
979  
980  
981  
982  
983  
984  
985  
986  
987  
988  
989  
990  
991  
992  
993  
994  
995  
996  
997  
998  
999  
1000

#### 56 ***Consent to publish***

57  
58  
59  
60  
61  
62  
63  
64  
65  
66  
67  
68  
69  
70  
71  
72  
73  
74  
75  
76  
77  
78  
79  
80  
81  
82  
83  
84  
85  
86  
87  
88  
89  
90  
91  
92  
93  
94  
95  
96  
97  
98  
99  
100  
101  
102  
103  
104  
105  
106  
107  
108  
109  
110  
111  
112  
113  
114  
115  
116  
117  
118  
119  
120  
121  
122  
123  
124  
125  
126  
127  
128  
129  
130  
131  
132  
133  
134  
135  
136  
137  
138  
139  
140  
141  
142  
143  
144  
145  
146  
147  
148  
149  
150  
151  
152  
153  
154  
155  
156  
157  
158  
159  
160  
161  
162  
163  
164  
165  
166  
167  
168  
169  
170  
171  
172  
173  
174  
175  
176  
177  
178  
179  
180  
181  
182  
183  
184  
185  
186  
187  
188  
189  
190  
191  
192  
193  
194  
195  
196  
197  
198  
199  
200  
201  
202  
203  
204  
205  
206  
207  
208  
209  
210  
211  
212  
213  
214  
215  
216  
217  
218  
219  
220  
221  
222  
223  
224  
225  
226  
227  
228  
229  
230  
231  
232  
233  
234  
235  
236  
237  
238  
239  
240  
241  
242  
243  
244  
245  
246  
247  
248  
249  
250  
251  
252  
253  
254  
255  
256  
257  
258  
259  
260  
261  
262  
263  
264  
265  
266  
267  
268  
269  
270  
271  
272  
273  
274  
275  
276  
277  
278  
279  
280  
281  
282  
283  
284  
285  
286  
287  
288  
289  
290  
291  
292  
293  
294  
295  
296  
297  
298  
299  
300  
301  
302  
303  
304  
305  
306  
307  
308  
309  
310  
311  
312  
313  
314  
315  
316  
317  
318  
319  
320  
321  
322  
323  
324  
325  
326  
327  
328  
329  
330  
331  
332  
333  
334  
335  
336  
337  
338  
339  
340  
341  
342  
343  
344  
345  
346  
347  
348  
349  
350  
351  
352  
353  
354  
355  
356  
357  
358  
359  
360  
361  
362  
363  
364  
365  
366  
367  
368  
369  
370  
371  
372  
373  
374  
375  
376  
377  
378  
379  
380  
381  
382  
383  
384  
385  
386  
387  
388  
389  
390  
391  
392  
393  
394  
395  
396  
397  
398  
399  
400  
401  
402  
403  
404  
405  
406  
407  
408  
409  
410  
411  
412  
413  
414  
415  
416  
417  
418  
419  
420  
421  
422  
423  
424  
425  
426  
427  
428  
429  
430  
431  
432  
433  
434  
435  
436  
437  
438  
439  
440  
441  
442  
443  
444  
445  
446  
447  
448  
449  
450  
451  
452  
453  
454  
455  
456  
457  
458  
459  
460  
461  
462  
463  
464  
465  
466  
467  
468  
469  
470  
471  
472  
473  
474  
475  
476  
477  
478  
479  
480  
481  
482  
483  
484  
485  
486  
487  
488  
489  
490  
491  
492  
493  
494  
495  
496  
497  
498  
499  
500  
501  
502  
503  
504  
505  
506  
507  
508  
509  
510  
511  
512  
513  
514  
515  
516  
517  
518  
519  
520  
521  
522  
523  
524  
525  
526  
527  
528  
529  
530  
531  
532  
533  
534  
535  
536  
537  
538  
539  
540  
541  
542  
543  
544  
545  
546  
547  
548  
549  
550  
551  
552  
553  
554  
555  
556  
557  
558  
559  
560  
561  
562  
563  
564  
565  
566  
567  
568  
569  
570  
571  
572  
573  
574  
575  
576  
577  
578  
579  
580  
581  
582  
583  
584  
585  
586  
587  
588  
589  
590  
591  
592  
593  
594  
595  
596  
597  
598  
599  
600  
601  
602  
603  
604  
605  
606  
607  
608  
609  
610  
611  
612  
613  
614  
615  
616  
617  
618  
619  
620  
621  
622  
623  
624  
625  
626  
627  
628  
629  
630  
631  
632  
633  
634  
635  
636  
637  
638  
639  
640  
641  
642  
643  
644  
645  
646  
647  
648  
649  
650  
651  
652  
653  
654  
655  
656  
657  
658  
659  
660  
661  
662  
663  
664  
665  
666  
667  
668  
669  
670  
671  
672  
673  
674  
675  
676  
677  
678  
679  
680  
681  
682  
683  
684  
685  
686  
687  
688  
689  
690  
691  
692  
693  
694  
695  
696  
697  
698  
699  
700  
701  
702  
703  
704  
705  
706  
707  
708  
709  
710  
711  
712  
713  
714  
715  
716  
717  
718  
719  
720  
721  
722  
723  
724  
725  
726  
727  
728  
729  
730  
731  
732  
733  
734  
735  
736  
737  
738  
739  
740  
741  
742  
743  
744  
745  
746  
747  
748  
749  
750  
751  
752  
753  
754  
755  
756  
757  
758  
759  
760  
761  
762  
763  
764  
765  
766  
767  
768  
769  
770  
771  
772  
773  
774  
775  
776  
777  
778  
779  
780  
781  
782  
783  
784  
785  
786  
787  
788  
789  
790  
791  
792  
793  
794  
795  
796  
797  
798  
799  
800  
801  
802  
803  
804  
805  
806  
807  
808  
809  
810  
811  
812  
813  
814  
815  
816  
817  
818  
819  
820  
821  
822  
823  
824  
825  
826  
827  
828  
829  
830  
831  
832  
833  
834  
835  
836  
837  
838  
839  
840  
841  
842  
843  
844  
845  
846  
847  
848  
849  
850  
851  
852  
853  
854  
855  
856  
857  
858  
859  
860  
861  
862  
863  
864  
865  
866  
867  
868  
869  
870  
871  
872  
873  
874  
875  
876  
877  
878  
879  
880  
881  
882  
883  
884  
885  
886  
887  
888  
889  
890  
891  
892  
893  
894  
895  
896  
897  
898  
899  
900  
901  
902  
903  
904  
905  
906  
907  
908  
909  
910  
911  
912  
913  
914  
915  
916  
917  
918  
919  
920  
921  
922  
923  
924  
925  
926  
927  
928  
929  
930  
931  
932  
933  
934  
935  
936  
937  
938  
939  
940  
941  
942  
943  
944  
945  
946  
947  
948  
949  
950  
951  
952  
953  
954  
955  
956  
957  
958  
959  
960  
961  
962  
963  
964  
965  
966  
967  
968  
969  
970  
971  
972  
973  
974  
975  
976  
977  
978  
979  
980  
981  
982  
983  
984  
985  
986  
987  
988  
989  
990  
991  
992  
993  
994  
995  
996  
997  
998  
999  
1000

### *Availability of data and materials*

The data will be made available on request

### *Competing interests*

The authors declare that they have no competing interests.

### *Funding*

No funding was received

### *Authors' Contributions*

HTNG, AMA, KH, NTH, PNL collaboratively designed the study. All authors developed the conceptual framework for the manuscript. HTNG and AMA drafted the manuscript, which was then revised by NTH, KH, HS, RYF, MMK, MHAO, SAMA, LPT, AEAEG, SAE and PNL. All authors read and approved the final manuscript. All authors have agreed on personally accountable for the author's own contributions and to ensure that questions related to the accuracy or integrity of any part of the work were appropriately investigated.

### *Acknowledgements*

We would like to thank all those who spent time to answer the questionnaire. Thanks to Online Research Club members (<http://www.onlineresearchclub.org>) for giving comment to improve the questionnaire. Thanks to Dr. Nguyen Lam Vuong (University of Medicine and Pharmacy, Ho Chi Minh City, Viet Nam) for giving valuable feedback on questionnaire.

## **REFERENCES**

1. **Higgins JPT, Green S (editors). Cochrane Handbook for Systematic Reviews of Interventions Version 5.1.0 [updated March 2011]. The Cochrane Collaboration, 2011. Available from <http://handbook.cochrane.org>.**

- 1  
2  
3  
4  
5  
6  
7  
8  
9  
10  
11  
12  
13  
14  
15  
16  
17  
18  
19  
20  
21  
22  
23  
24  
25  
26  
27  
28  
29  
30  
31  
32  
33  
34  
35  
36  
37  
38  
39  
40  
41  
42  
43  
44  
45  
46  
47  
48  
49  
50  
51  
52  
53  
54  
55  
56  
57  
58  
59  
60  
61  
62  
63  
64  
65
2. Yuan Y, Hunt RH: **Systematic reviews: the good, the bad, and the ugly.** *The American journal of gastroenterology* 2009, **104**(5):1086-1092.
3. Esterhuizen TM, Thabane L: **Con: Meta-analysis: some key limitations and potential solutions.** *Nephrology Dialysis Transplantation* 2016, **31**(6):882-885.
4. Glass GV: **Primary, Secondary, and Meta-Analysis of Research.** *Educational Researcher* 1976, **5**(10):3-8.
5. Zoccali C: **Moderator's view: Meta-analysis: the best knowledge but not always shining gold.** *Nephrology Dialysis Transplantation* 2016, **31**(6):886-889.
6. Hung BT, Long NP, Hung le P, Luan NT, Anh NH, Nghi TD, Hieu MV, Trang NT, Rafidinarivo HF, Anh NK *et al*: **Research trends in evidence-based medicine: a joinpoint regression analysis of more than 50 years of publication data.** *PloS one* 2015, **10**(4):e0121054.
7. Sackett DL, Rosenberg WMC, Gray JAM, Haynes RB, Richardson WS: **Evidence based medicine: what it is and what it isn't.** *BMJ* 1996, **312**(7023):71.
8. Juni P, Witschi A, Bloch R, Egger M: **The hazards of scoring the quality of clinical trials for meta-analysis.** *Jama* 1999, **282**(11):1054-1060.
9. Balk EM, Bonis PA, Moskowitz H, Schmid CH, Ioannidis JP, Wang C, Lau J: **Correlation of quality measures with estimates of treatment effect in meta-analyses of randomized controlled trials.** *Jama* 2002, **287**(22):2973-2982.
10. Moyer A, Finney JW: **Rating methodological quality: toward improved assessment and investigation.** *Accountability in research* 2005, **12**(4):299-313.
11. Moayyedi P: **Meta-analysis: Can We Mix Apples and Oranges?** *The American journal of gastroenterology* 2004, **99**:2297.
12. Shea BJ, Grimshaw JM, Wells GA, Boers M, Andersson N, Hamel C, Porter AC, Tugwell P, Moher D, Bouter LM: **Development of AMSTAR: a measurement tool to assess the methodological quality of systematic reviews.** *BMC Medical Research Methodology* 2007, **7**(1):10.
13. Moher D, Liberati A, Tetzlaff J, Altman DG, Group P: **Preferred reporting items for systematic reviews and meta-analyses: the PRISMA Statement.** *Open medicine : a peer-reviewed, independent, open-access journal* 2009, **3**(3):e123-e130.
14. Shea BJ, Reeves BC, Wells G, Thuku M, Hamel C, Moran J, Moher D, Tugwell P, Welch V, Kristjansson E: **AMSTAR 2: a critical appraisal tool for systematic reviews that include randomised or non-randomised studies of healthcare interventions, or both.** *Bmj* 2017, **358**:j4008.
15. Whiting P, Savović J, Higgins JP, Caldwell DM, Reeves BC, Shea B, Davies P, Kleijnen J, Churchill R: **ROBIS: a new tool to assess risk of bias in systematic reviews was developed.** *Journal of clinical epidemiology* 2016, **69**:225-234.

16. Popay J, Roberts H, Sowden A, Petticrew M, Arai L, Rodgers M, Britten N, Roen K, Duffy S: **Guidance on the conduct of narrative synthesis in systematic reviews.** *A product from the ESRC methods programme Version 2006*, 1:b92.
17. Mokkink LB, Terwee CB, Stratford PW, Alonso J, Patrick DL, Riphagen I, Knol DL, Bouter LM, de Vet HC: **Evaluation of the methodological quality of systematic reviews of health status measurement instruments.** *Quality of Life Research* 2009, **18**(3):313-333.
18. Andrews D, Nonnecke B, Preece J: **Electronic Survey Methodology: A Case Study in Reaching Hard-to-Involve Internet Users.** *International Journal of Human-Computer Interaction* 2003, **16**(2):185-210.
19. Cook C, Heath F, Thompson RL: **A Meta-Analysis of Response Rates in Web- or Internet-Based Surveys.** *Educational and Psychological Measurement* 2000, **60**(6):821-836.
20. **Schonlau, Matthias, Ronald D. Fricker, and Marc N. Elliott, Conducting Research Surveys via E-mail and the Web.** Santa Monica, CA: RAND Corporation, 2002.  
[https://www.rand.org/pubs/monograph\\_reports/MR1480.html](https://www.rand.org/pubs/monograph_reports/MR1480.html). Also available in print form.
21. **World Medical Association Declaration of Helsinki: ethical principles for medical research involving human subjects.** *Jama* 2013, **310**(20):2191-2194.
22. Moher D, Cook DJ, Eastwood S, Olkin I, Rennie D, Stroup DF: **Improving the quality of reports of meta-analyses of randomised controlled trials: the QUOROM statement. Quality of Reporting of Meta-analyses.** *Lancet* 1999, **354**(9193):1896-1900.
23. Dosenovic S, Kadic AJ, Vucic K, Markovina N, Pieper D, Puljak L: **Comparison of methodological quality rating of systematic reviews on neuropathic pain using AMSTAR and R-AMSTAR.** *BMC medical research methodology* 2018, **18**(1):37.
24. Sharma S, Oremus M: **PRISMA and AMSTAR show systematic reviews on health literacy and cancer screening are of good quality.** *Journal of clinical epidemiology* 2018, **99**:123-131.
25. Wu X, Sun H, Zhou X, Wang J, Li J: **Quality assessment of systematic reviews on total hip or knee arthroplasty using mod-AMSTAR.** *BMC Medical Research Methodology* 2018, **18**(1):30.
26. Shea B, Bouter LM, Grimshaw JM, Francis D, Ortiz Z, Wells GA, Tugwell PS, Boers M: **Scope for improvement in the quality of reporting of systematic reviews. From the Cochrane Musculoskeletal Group.** *The Journal of rheumatology* 2006, **33**(1):9-15.
27. Moseley AM, Elkins MR, Herbert RD, Maher CG, Sherrington C: **Cochrane reviews used more rigorous methods than non-Cochrane reviews: survey of systematic reviews in physiotherapy.** *Journal of clinical epidemiology* 2009, **62**(10):1021-1030.

- 1  
2  
3  
4  
5  
6  
7  
8  
9  
10  
11  
12  
13  
14  
15  
16  
17  
18  
19  
20  
21  
22  
23  
24  
25  
26  
27  
28  
29  
30  
31  
32  
33  
34  
35  
36  
37  
38  
39  
40  
41  
42  
43  
44  
45  
46  
47  
48  
49  
50  
51  
52  
53  
54  
55  
56  
57  
58  
59  
60  
61  
62  
63  
64  
65
28. Egger M, Juni P, Bartlett C, Hohenstein F, Sterne J: **How important are comprehensive literature searches and the assessment of trial quality in systematic reviews? Empirical study.** *Health technology assessment (Winchester, England)* 2003, **7**(1):76.
29. Royle P, Waugh N: **Literature searching for clinical and cost-effectiveness studies used in health technology assessment reports carried out for the National Institute for Clinical Excellence appraisal system.** *Health technology assessment (Winchester, England)* 2003, **7**(34):iii, ix-x, 1-51.
30. Chapman AL, Morgan LC, Gartlehner G: **Semi-automating the manual literature search for systematic reviews increases efficiency.** *Health information and libraries journal* 2010, **27**(1):22-27.
31. Koffel JB: **Use of Recommended Search Strategies in Systematic Reviews and the Impact of Librarian Involvement: A Cross-Sectional Survey of Recent Authors.** *PloS one* 2015, **10**(5):e0125931.
32. Charrois TL: **Systematic Reviews: What Do You Need to Know to Get Started?** *The Canadian Journal of Hospital Pharmacy* 2015, **68**(2):144-148.
33. **Haynes RB. Clinical epidemiology: how to do clinical practice research: Lippincott williams & wilkins; 2012.**
34. Pildal J, Hrobjartsson A, Jorgensen KJ, Hilden J, Altman DG, Gotzsche PC: **Impact of allocation concealment on conclusions drawn from meta-analyses of randomized trials.** *Int J Epidemiol* 2007, **36**(4):847-857.
35. **Lajeunesse MJ, Koricheva J, Gurevitch J, Mengersen K. Recovering missing or partial data from studies: a survey of conversions and imputations for meta-analysis. Handbook of Meta-analysis in Ecology and Evolution 2013: 195-206.**
36. Dosenovic S, Jelicic Kadic A, Vucic K, Markovina N, Pieper D, Puljak L: **Comparison of methodological quality rating of systematic reviews on neuropathic pain using AMSTAR and R-AMSTAR.** *BMC Medical Research Methodology* 2018, **18**:37.
37. Sharma S, Oremus M: **PRISMA and AMSTAR show systematic reviews on health literacy and cancer screening are of good quality.** *Journal of clinical epidemiology* 2018, **99**:123-131.
38. **Noyes J, Lewin S. Chapter 5: Extracting qualitative evidence. In: Noyes J, Booth A, Hannes K, et al., eds. Supplementary Guidance for Inclusion of Qualitative Research in Cochrane Systematic Reviews of Interventions. Version 1 ed; 2011.**
39. Jones AP, Remington T, Williamson PR, Ashby D, Smyth RL: **High prevalence but low impact of data extraction and reporting errors were found in Cochrane systematic reviews.** *Journal of clinical epidemiology* 2005, **58**(7):741-742.
40. **Zein H, Tran VL-H, Azmy A, et al. How to Extract Data from Graphs using Plot Digitizer or Getdata Graph Digitizer. 2015.**

- 1  
2  
3 41. Jelacic Kadic A, Vucic K, Dosenovic S, Sapunar D, Puljak L: **Extracting data from figures with software was faster, with higher interrater reliability than manual extraction.** *Journal of clinical epidemiology* 2016, **74**:119-123.
- 4  
5 42. J. LM, R. FM: **Variable reporting and quantitative reviews: a comparison of three meta-analytical techniques.** *Ecology Letters* 2003, **6**(5):448-454.
- 6  
7 43. **Del Re AC. compute. es: Compute effect sizes. R package version 2013: 0.2-.**
- 8  
9 44. **Lajeunesse MJ, Koricheva J, Gurevitch J, Mengersen K. Recovering missing or partial data from studies: a survey of conversions and imputations for meta-analysis. Handbook of Meta-analysis in Ecology and Evolution 2013: 195-206.**
- 10  
11 45. Rubin DB, Schenker N: **Multiple imputation in health-care databases: an overview and some applications.** *Statistics in medicine* 1991, **10**(4):585-598.
- 12  
13 46. **Bracken MB. Statistical methods for analysis of effects of treatment in overviews of randomized trials. Effective care of the newborn infant 1992: 13-20.**
- 14  
15 47. Schroll JB, Bero L, Gøtzsche PC: **Searching for unpublished data for Cochrane reviews: cross sectional study.** *BMJ : British Medical Journal* 2013, **346**.
- 16  
17  
18  
19  
20  
21  
22  
23  
24  
25  
26  
27  
28  
29  
30  
31  
32  
33  
34  
35  
36  
37  
38  
39  
40  
41  
42  
43  
44  
45  
46  
47  
48  
49  
50  
51  
52  
53  
54  
55  
56  
57  
58  
59  
60  
61  
62  
63  
64  
65

**Table 1. Demographic and professional characteristics of responders**

| <b>Characteristics</b>                                            | <b>Number (%)</b> |
|-------------------------------------------------------------------|-------------------|
| Age (mean $\pm$ SD), n=360                                        | 44.0 $\pm$ 11.6   |
| Men, n=384                                                        | 258 (67.2)        |
| European, n=379                                                   | 192 (50.7)        |
| Specialty, n=379                                                  |                   |
| Internal medicine                                                 | 186 (49.0)        |
| Surgery                                                           | 94 (24.8)         |
| SRs/statistics/epidemiology                                       | 51 (13.5)         |
| Others                                                            | 48 (12.7)         |
| Year of experience in SR/MA, mean (SD), n=378                     | 8.6 (6.3)         |
| >5 years' experience                                              | 213 (56.3)        |
| Number of publications in SR/MA, (mean $\pm$ SD), n=375           | 13.6 $\pm$ 32.9   |
| Highest impact factor of published SR/MA, n=373                   |                   |
| 0 – 2                                                             | 34 (9.1)          |
| 2 – 5                                                             | 128 (34.3)        |
| 5 -10                                                             | 124 (33.2)        |
| 10 -20                                                            | 49 (13.1)         |
| >20                                                               | 38 (10.2)         |
| Experience in data extraction for SR/MA of clinical trials, n=384 | 368 (95.8)        |
| Directly extracted                                                | 339 (88.3)        |
| Instruct students to extract                                      | 29 (7.6)          |

The data is represented by the number and percentage (%) or the mean  $\pm$  standard deviation (SD). SR/MA: systematic review and meta-analysis.

1  
2  
3  
4  
5  
6  
7



**Table 2. The results of search databases, risk of bias assessment, and data extraction for SR/MA.**

| Variable                                                                                                                                     | Number (%) |
|----------------------------------------------------------------------------------------------------------------------------------------------|------------|
| Number of databases used in SR/MA, n=382                                                                                                     |            |
| 1 – 2                                                                                                                                        | 44 (11.5)  |
| 3 – 5                                                                                                                                        | 241 (63.1) |
| 6 – 10                                                                                                                                       | 75 (19.6)  |
| >10                                                                                                                                          | 22 (5.8)   |
| Searched Grey Literature Databases, n=378                                                                                                    |            |
| Conduct a manual search, n=380                                                                                                               |            |
| Always                                                                                                                                       | 171 (45.0) |
| Often                                                                                                                                        | 92 (24.2)  |
| Sometimes                                                                                                                                    | 64 (16.8)  |
| Seldom                                                                                                                                       | 35 (9.2)   |
| Never                                                                                                                                        | 18 (4.7)   |
| While extracting the data, you accidentally found a new relevant paper. Did you include this paper via manual search or other sources? n=371 |            |
| Yes                                                                                                                                          | 351 (94.6) |
| No                                                                                                                                           | 20 (5.4)   |
| Did you update the search to get more recent papers, n=370                                                                                   |            |
| Yes                                                                                                                                          | 323 (87.3) |
| No                                                                                                                                           | 47 (12.7)  |
| Tools used to evaluate the risk of bias of clinical trials, n=351                                                                            |            |
| Cochrane Collaboration's tool                                                                                                                | 263 (74.9) |
| Other (Downs & Black, CONSORT, MODIFIED JADAD, CAMARADES TOOL, Pedro, GRADE....)                                                             | 88 (25.1)  |
| Number of reviewers in a team to extract the data, n=384                                                                                     |            |
| One reviewer extracts it, another or more reviewers check it                                                                                 | 116 (30.2) |
| Two reviewers extract it                                                                                                                     | 223 (58.1) |
| Three reviewers extract it                                                                                                                   | 20 (5.2)   |
| Four or more reviewers extract it                                                                                                            | 25 (6.5)   |
| The original articles give the data in only figures or graphical representation, n=376                                                       |            |
| Contact authors to get raw data                                                                                                              | 211 (56.1) |
| I did not know there is a digital software to extract it                                                                                     | 75 (19.9)  |
| Use a digital software to extract it                                                                                                         | 77 (20.5)  |

|   |                                                                         |            |
|---|-------------------------------------------------------------------------|------------|
| 1 | I did not extract it because I think the digital software is unreliable | 13 (3.5)   |
| 2 | The data used in extracting the survival percentage. n=356              |            |
| 3 |                                                                         |            |
| 4 | Raw data                                                                | 118 (33.1) |
| 5 | Percentage estimated from Kaplan-Meier curve                            | 50 (14.0)  |
| 6 |                                                                         |            |
| 7 | I have never analyzed it                                                | 177 (49.7) |
| 8 |                                                                         |            |
| 9 | Other                                                                   | 11 (3.1)   |

---

The data is represented by the number and percentage (%). SR/MA: systematic review and meta-analysis.

10  
11  
12  
13  
14 1  
15  
16 2  
17  
18  
19 3  
20  
21  
22 4  
23  
24 5  
25 6  
26  
27 7  
28  
29 8  
30  
31 9  
32  
33 10  
34  
35 11  
36  
37 12  
38  
39 13  
40  
41 14  
42  
43 15  
44  
45 16  
46  
47 17  
48  
49 18  
50  
51 19  
52  
53 20  
54  
55 21  
56  
57 22  
58  
59 23  
60  
61  
62  
63  
64  
65

**Table 3. Association of professional characteristics with good attitude in data extraction and MA procedures.**

| Items                                                | Years of experience<br>(>5 years) |           |         | Number of publications<br>(>14) |         |         | Highest impact factor<br>journals of published<br>papers (>10) |         |         |
|------------------------------------------------------|-----------------------------------|-----------|---------|---------------------------------|---------|---------|----------------------------------------------------------------|---------|---------|
|                                                      | OR                                | 95% CI    | P value | OR                              | 95% CI  | P value | OR                                                             | 95% CI  | P value |
| Number of databases used (>6 databases)              | 1                                 | 0.6-1.6   | 0.9     | 1.5                             | 0.9-2.5 | 0.2     | 0.8                                                            | 0.5-1.4 | 0.5     |
| Search Grey Literature Databases                     | 2.1                               | 1.4-3.2   | <0.001  | 2.6                             | 1.5-4.2 | <0.001  | 1.3                                                            | 0.8-2.0 | 0.4     |
| Performing manual search                             | 0.8                               | 0.5-1.2   | 0.3     | 0.8                             | 0.5-1.3 | 0.3     | 0.8                                                            | 0.5-1.3 | 0.3     |
| Update the search to get more papers                 | 0.8                               | 0.4-1.5   | 0.4     | 0.6                             | 0.3-1.3 | 0.2     | 1.1                                                            | 0.5-2.4 | 0.7     |
| Number of reviewers to extract the data ( $\geq 2$ ) | 1.3                               | 0.8-2.0   | 0.2     | 1.9                             | 1.1-3.3 | 0.03    | 1.6                                                            | 0.9-2.8 | 0.09    |
| Using digital software to extract data from figures  | 1.6                               | 0.9-2.7   | 0.07    | 2.4                             | 1.4-4.1 | 0.002   | 2.3                                                            | 1.3-4.0 | 0.003   |
| Pooled twice in one MA                               | 0.3                               | 0.2-0.7   | 0.004   | 0.7                             | 0.4-1.2 | 0.2     | 0.7                                                            | 0.4-1.3 | 0.2     |
| Using raw data in MA                                 | 1.5                               | 0.99-2.26 | 0.05    | 1.8                             | 1.1-3.0 | 0.03    | 1.2                                                            | 0.8-2.0 | 0.4     |
| Meta-analyze both adjusted and unadjusted data       | 0.8                               | 0.5-1.2   | 0.3     | 0.9                             | 0.5-1.5 | 0.7     | 1.0                                                            | 0.6-1.7 | 0.8     |
| Combined Pearson and Spearman one meta-analysis      | 0.99                              | 0.4-2.4   | 0.98    | 1.2                             | 0.4-3.3 | 0.7     | 0.7                                                            | 0.2-2.1 | 0.5     |

OR; Odds ratio. CI; confidence interval. MA; Meta-analysis

1  
2  
3  
4  
5  
6  
7  
8  
9  
10

**Table 4. Results of MA and data synthesis**

| Variable                                                                                                                                                                | Number (%) |
|-------------------------------------------------------------------------------------------------------------------------------------------------------------------------|------------|
| Know pre/post-intervention data and post-intervention data (Yes), n=364                                                                                                 | 161 (44.2) |
| Investigating the efficacy of an intervention, and the pre- and post-intervention (pre/post) values for each group with the correlation value were not available, n=156 |            |
| Used pre/post-difference values for each group                                                                                                                          | 77 (49.4)  |
| Used post values for each group                                                                                                                                         | 40 (25.6)  |
| Used (pre/post) values for each group and use correlation value                                                                                                         | 39 (25.0)  |
| If the (pre/post) values for each group are the only data available but the correlation value is not available, what did you do? n=157                                  |            |
| Request authors of original articles                                                                                                                                    | 53 (33.8)  |
| Use a default correlation value of 0.5 if no response from authors                                                                                                      | 28 (17.8)  |
| Analyze several tests with correlation values ranging from 0.1-0.9 if nonresponse from authors                                                                          | 32 (20.4)  |
| I do not know what is meant by the correlation value                                                                                                                    | 44 (28)    |
| Using raw data (such as mean, SD) or analyzed results (such as p-values) in the MA, n=382                                                                               |            |
| Use raw data                                                                                                                                                            | 221 (57.9) |
| Use analyzed result                                                                                                                                                     | 26 (6.8)   |
| It is dependent on case by case                                                                                                                                         | 135 (35.3) |
| MA of adjusted or non-adjusted data, n=372                                                                                                                              |            |
| Unadjusted data alone                                                                                                                                                   | 118 (31.7) |
| Adjusted data alone                                                                                                                                                     | 58 (15.6)  |
| Meta-analyze both ways                                                                                                                                                  | 163 (43.8) |
| Select data that have higher level of nominal significance                                                                                                              | 9 (2.4)    |
| I don't know adjusted and unadjusted data                                                                                                                               | 24 (6.5)   |
| Repeating the same data of placebo in many subgroups when analyzing subgroup based on the concentration of the drug used, n=350                                         |            |
| Yes                                                                                                                                                                     | 75 (21.4)  |
| No, because the same population cannot be pooled twice in one MA. So the author should only perform subtotal results.                                                   | 275 (78.6) |
| Ever extracted Pearson correlation for analysis, n=370                                                                                                                  | 96 (25.9)  |
| Ever extracted Spearman correlation for analysis, n=368                                                                                                                 | 71 (19.3)  |

Dealing with Pearson and Spearman correlation in the MA (combining or separating), n=190

|                                           |            |
|-------------------------------------------|------------|
| Analyze each method separately in two MAs | 127 (66.8) |
| Use only Pearson method                   | 34 (17.9)  |
| Combine both in one MA                    | 23 (12.1)  |
| Use only Spearman method                  | 6 (3.2)    |

The data is represented by the number and percentage (%). MA; meta-analysis; standard deviation

1

2

1  
2  
3  
4  
5  
6  
7  
8  
9  
10  
11  
12  
13  
14  
15  
16  
17  
18  
19  
20  
21  
22  
23  
24  
25  
26  
27  
28  
29  
30  
31  
32  
33  
34  
35  
36  
37  
38  
39  
40  
41  
42  
43  
44  
45  
46  
47  
48  
49  
50  
51  
52  
53  
54  
55  
56  
57  
58  
59  
60  
61  
62  
63  
64  
65

1 Figure legends:

2 1) Figure 1. The flow chart of our study explaining the steps of data collection, handling, and  
3 reporting  
4

5 2) Figure 2: The proportions of respondents searching each database  
6

7  
8  
9  
10  
11  
12  
13  
14  
15  
16  
17  
18  
19  
20  
21  
22  
23  
24  
25  
26  
27  
28  
29  
30  
31  
32  
33  
34  
35  
36  
37  
38  
39  
40  
41  
42  
43  
44  
45  
46  
47  
48  
49  
50  
51  
52  
53  
54  
55  
56  
57  
58  
59  
60  
61  
62  
63  
64  
65

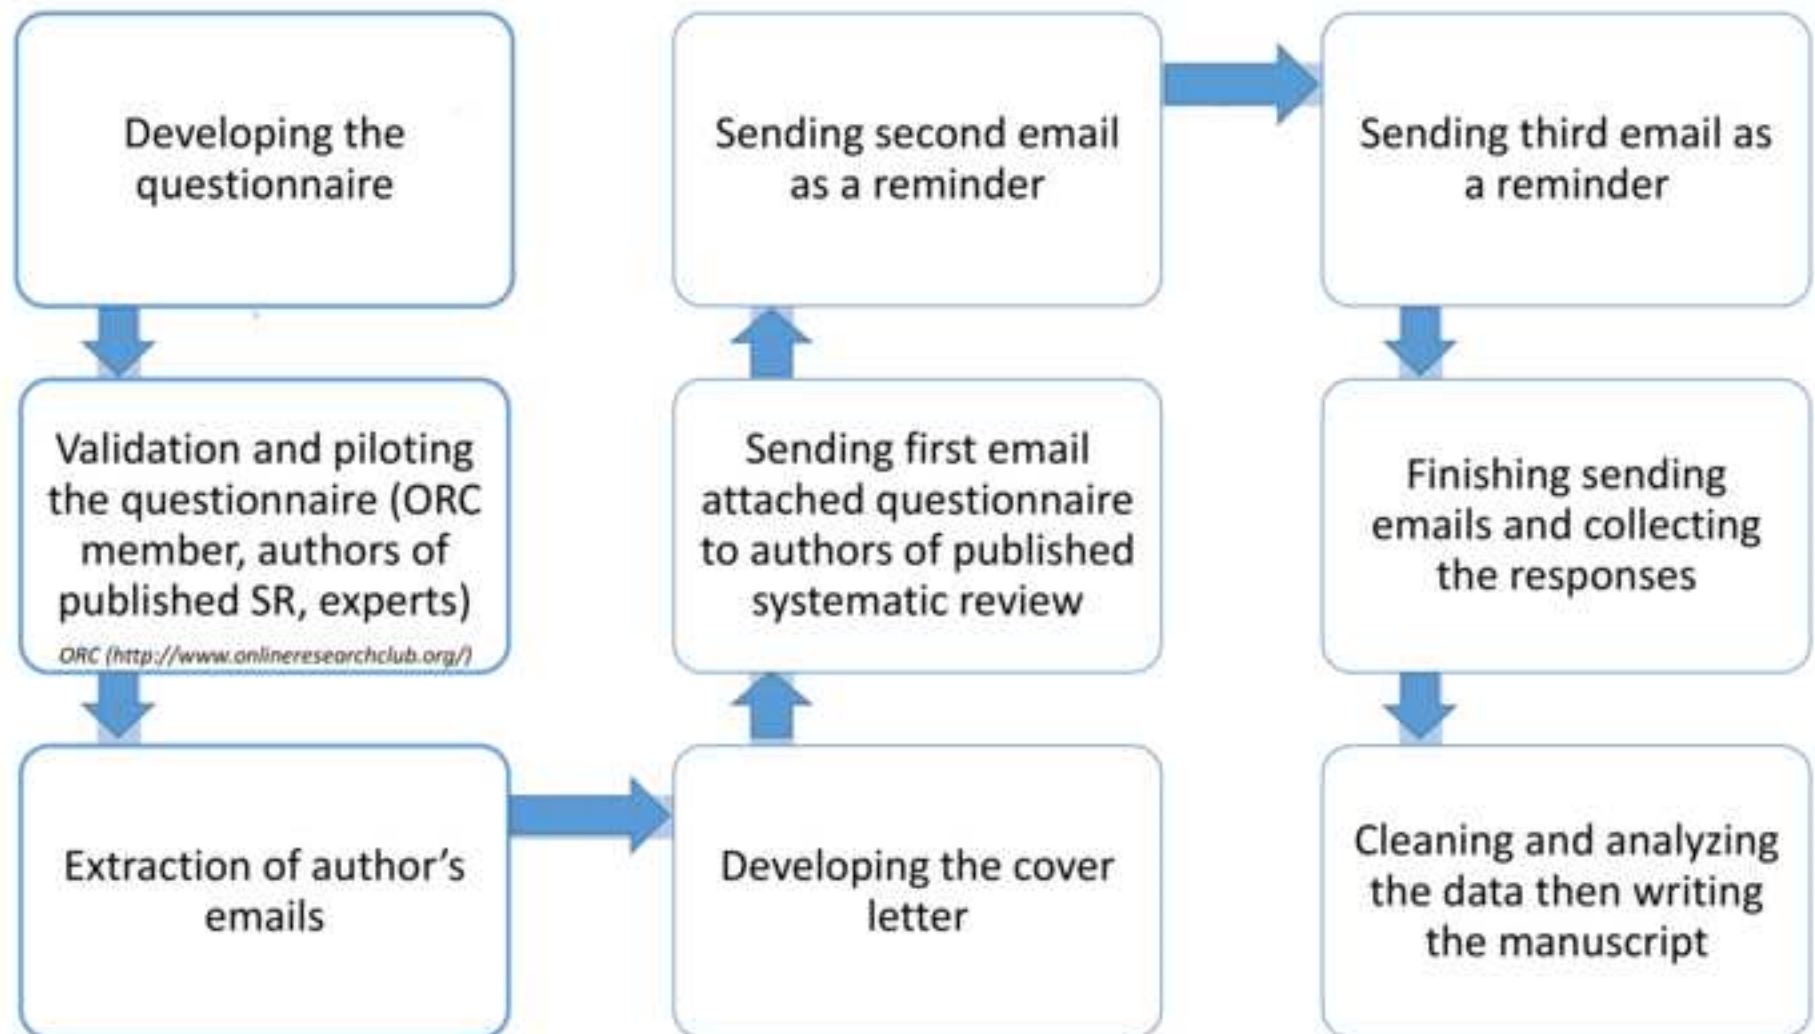

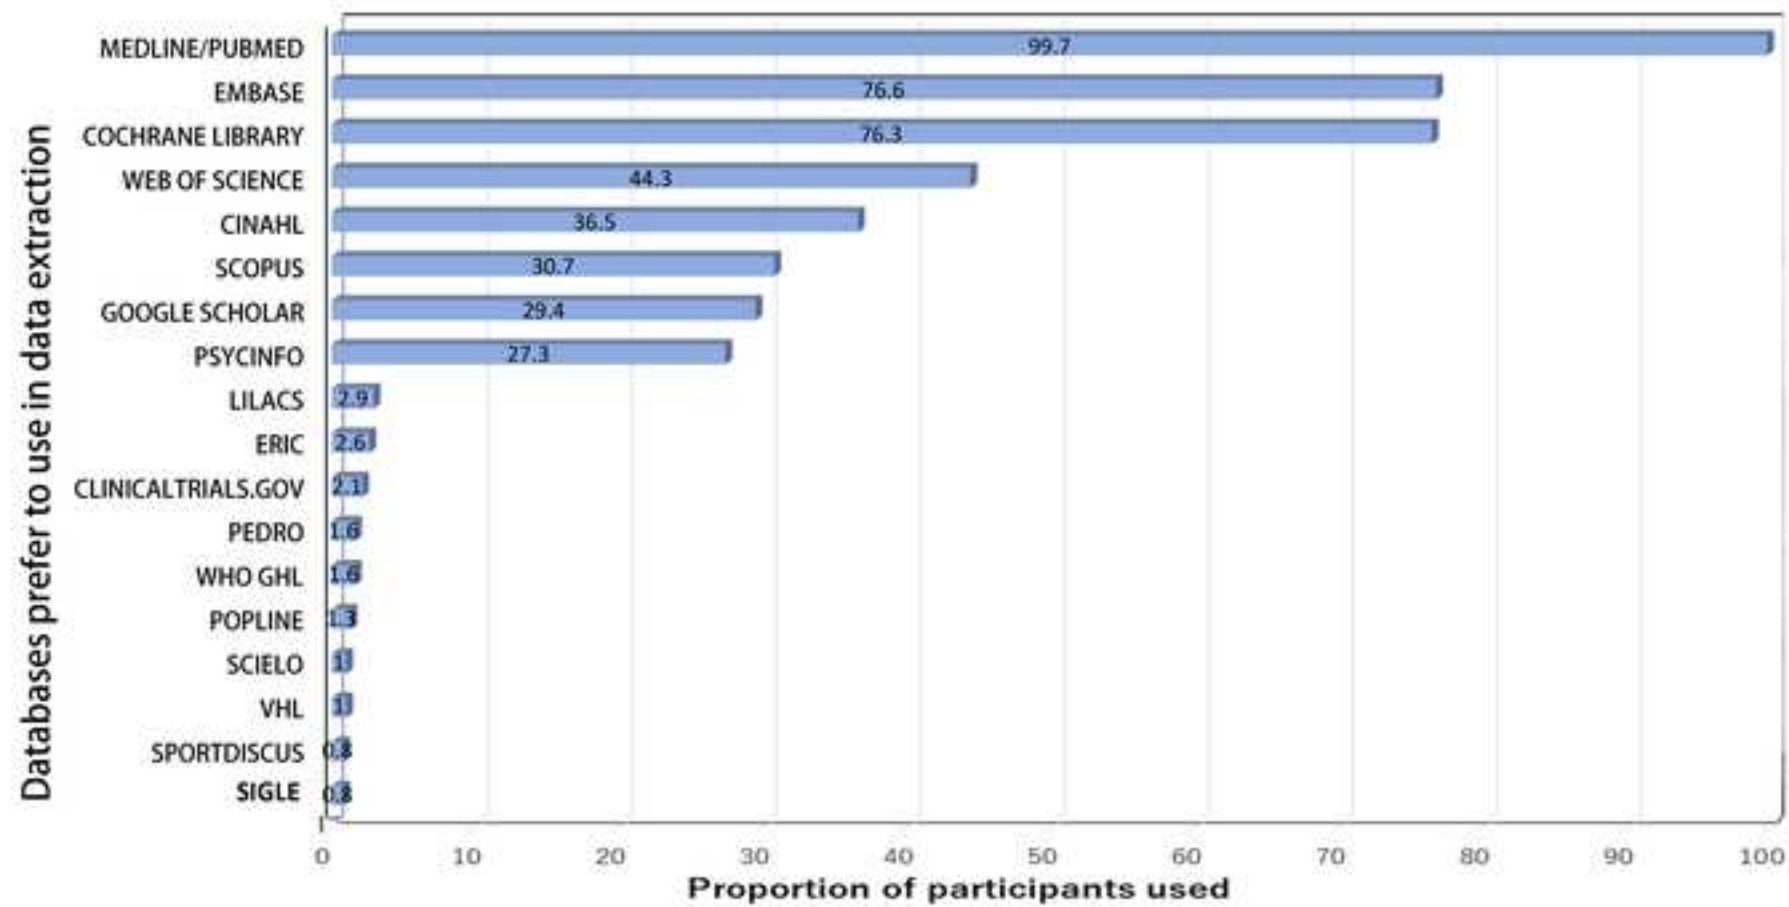





Click here to access/download  
**Supplementary Material**  
Appendix 1.docx





Click here to access/download  
**Supplementary Material**  
Appendix 2.pdf



Supplement: 12874_2019_780_MOESM1_ESM.pdf [file 12874_2019_780_MOESM1_ESM.pdf]
